# Supplementary material for: Rescuing the aberrant sex development of H3K9 demethylase Jmjd1a-deficient mice by modulating H3K9 methylation balance
Source: PubMed Central journal article supplement (PMC5630185; doi:10.1371/journal.pgen.1007034), 2017-09-26

**A***Jmjd1a*  $\Delta/+$ *Jmjd1a*  $\Delta/\Delta$ 

Gata4

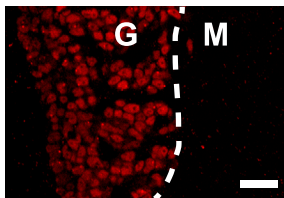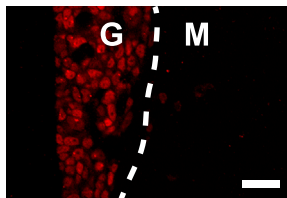

H3K9me2

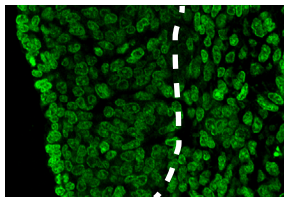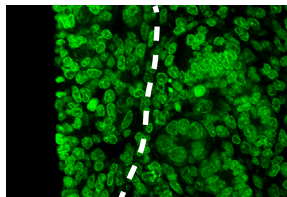

Merged

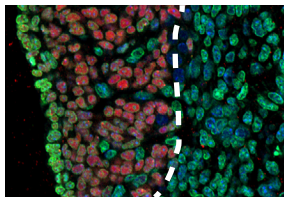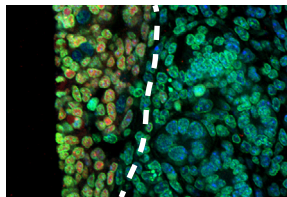**B***Jmjd1a*  $\Delta/+$ *Jmjd1a*  $\Delta/\Delta$ 

Gata4

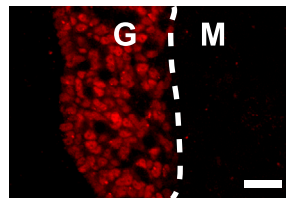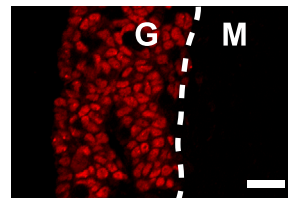

H3K9me3

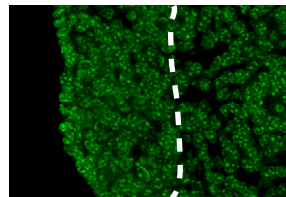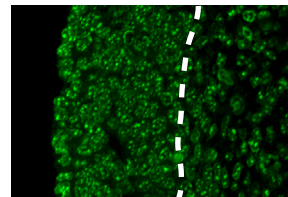

Merged

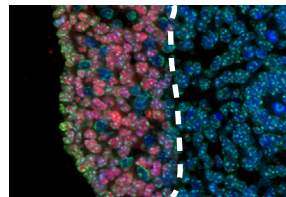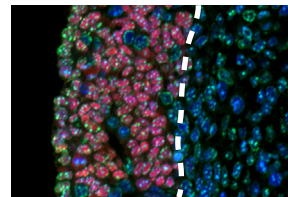

Supplement: pgen.1007034.s001.pdf [file pgen.1007034.s001.pdf]
