# Supplementary material for: Rescuing the aberrant sex development of H3K9 demethylase Jmjd1a-deficient mice by modulating H3K9 methylation balance
Source: PubMed Central journal article supplement (PMC5630185; doi:10.1371/journal.pgen.1007034), 2017-09-26

**A**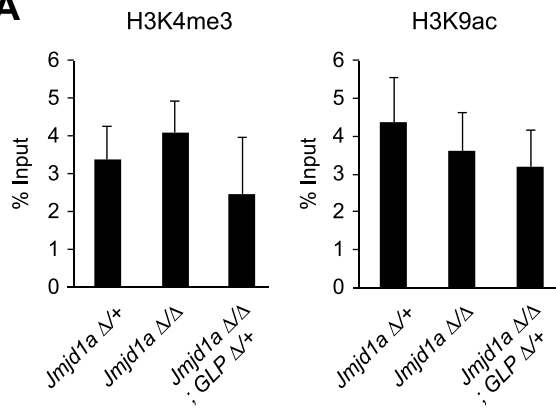**B**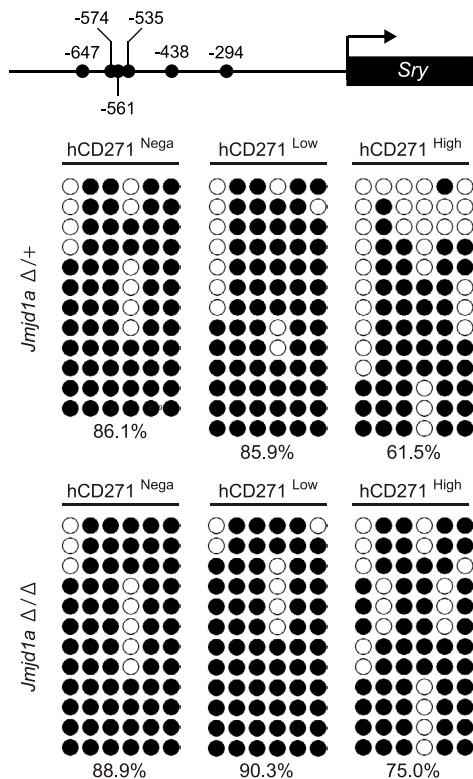**C**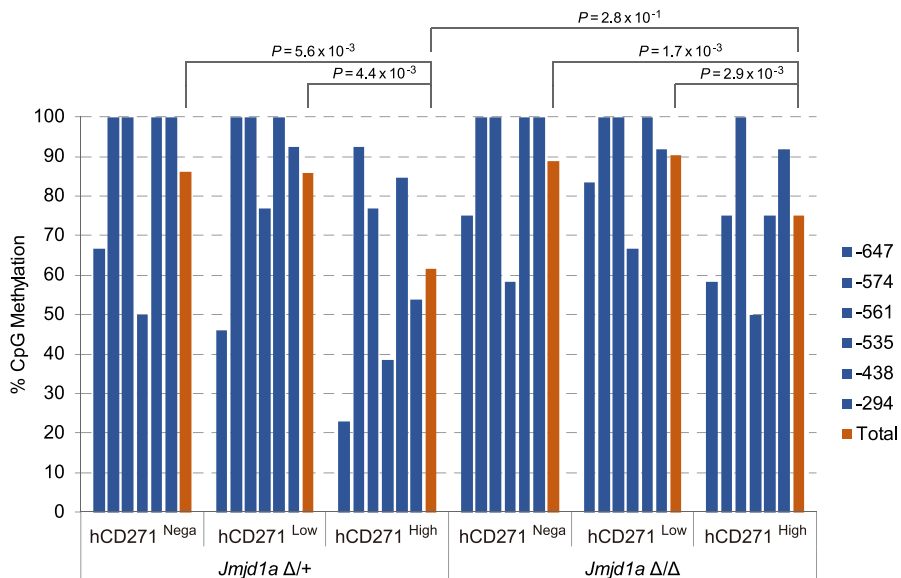

Supplement: pgen.1007034.s004.pdf [file pgen.1007034.s004.pdf]
