# Supplementary material for: Rescuing the aberrant sex development of H3K9 demethylase Jmjd1a-deficient mice by modulating H3K9 methylation balance
Source: PubMed Central journal article supplement (PMC5630185; doi:10.1371/journal.pgen.1007034), 2017-09-26

**A**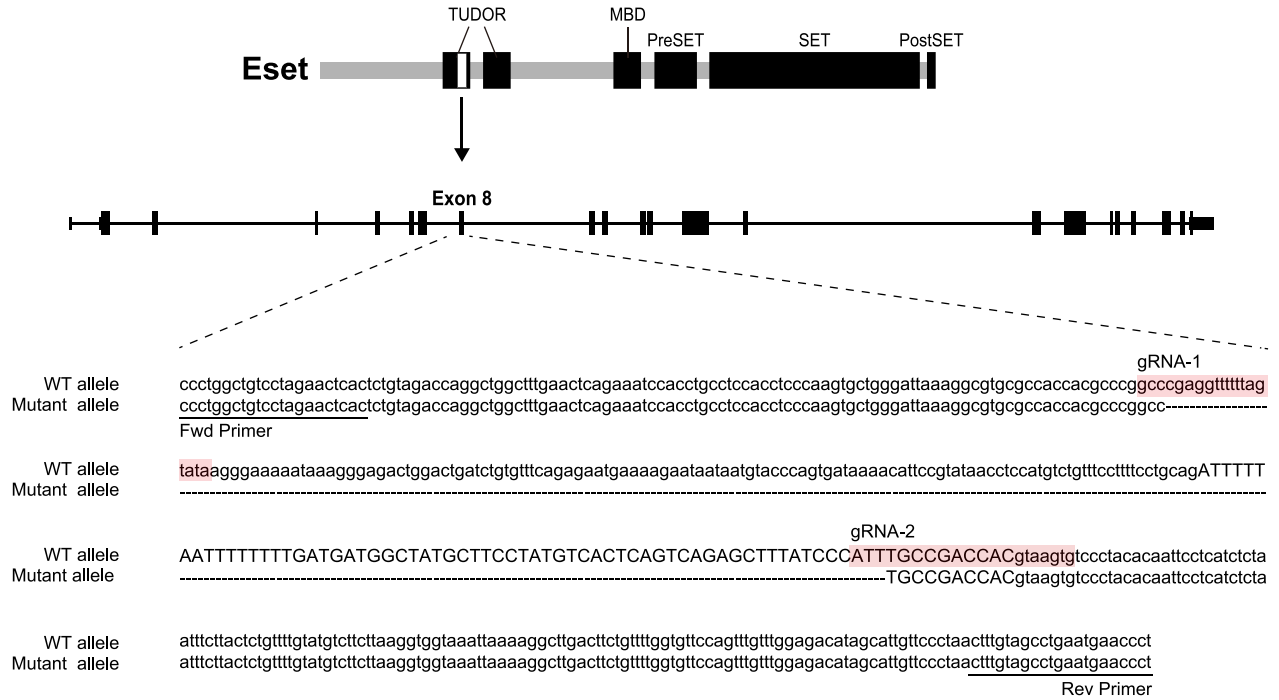**B**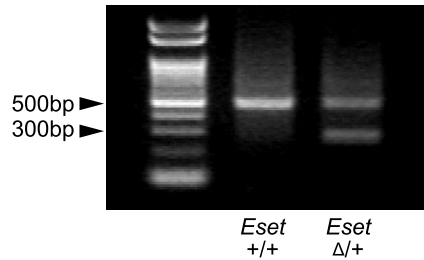**C**

*Eset* Δ/+ (♀) × *Eset* Δ/+ (♂)

Number of Pups (E13.5)

| <i>Eset</i> +/+ | <i>Eset</i> Δ/+ | <i>Eset</i> Δ/Δ |
|-----------------|-----------------|-----------------|
| 32%             | 68%             | 0%              |
| (11/34)         | (23/34)         | (0/34)          |

**D**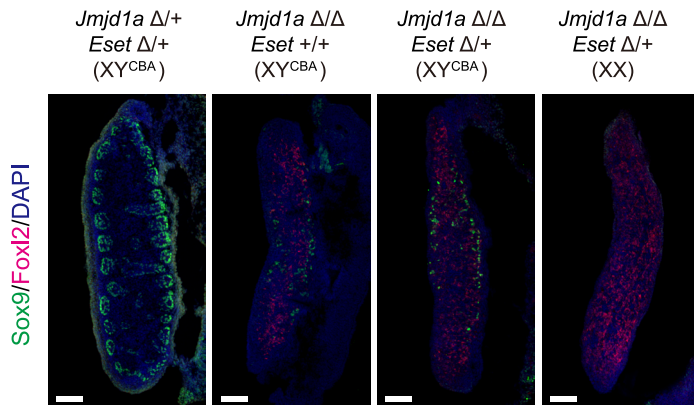**E**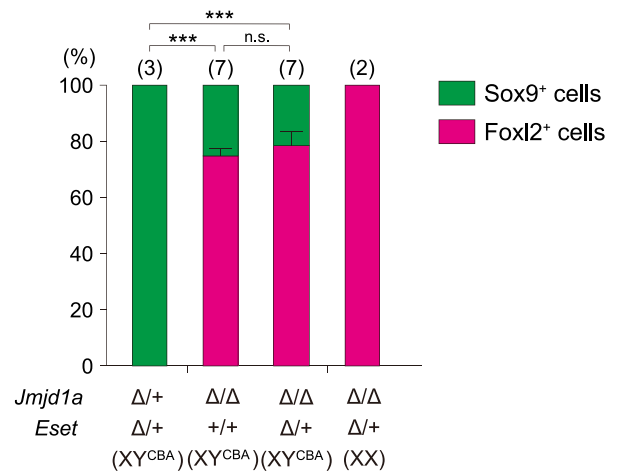

Supplement: pgen.1007034.s008.pdf [file pgen.1007034.s008.pdf]
